# Supplementary material
Source: ML conference proceedings conference paper supplement (https://openreview.net/forum?id=aWRMvXTvPf)

1 - Coefficient of determination

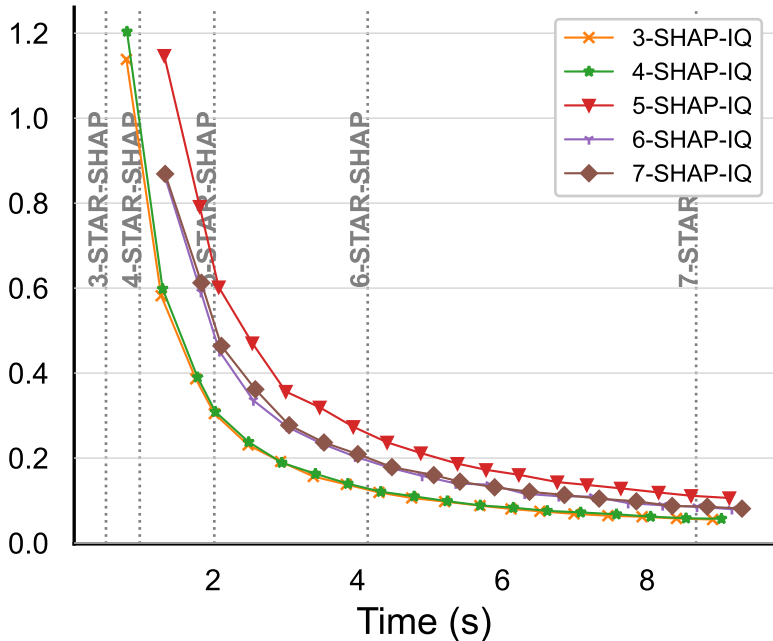

Supplement: supplementary_material [file attachment]

1 - Coefficient of determination

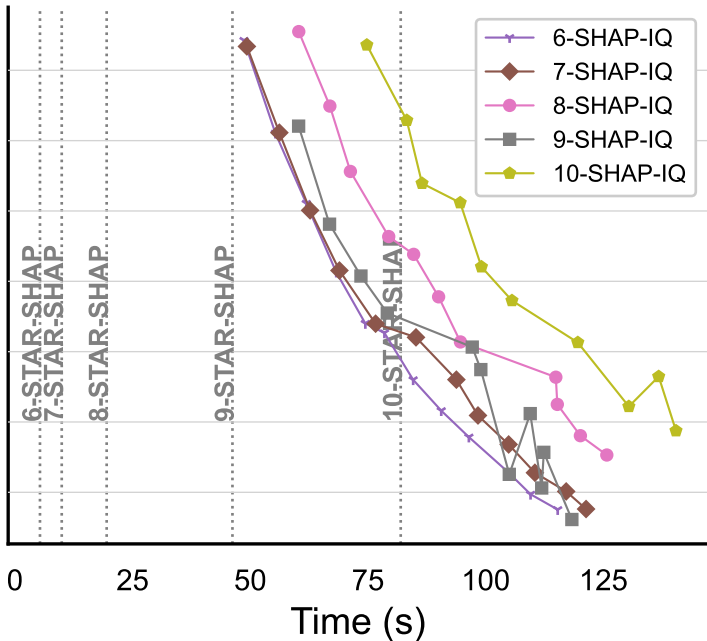

Supplement: supplementary_material [file attachment]

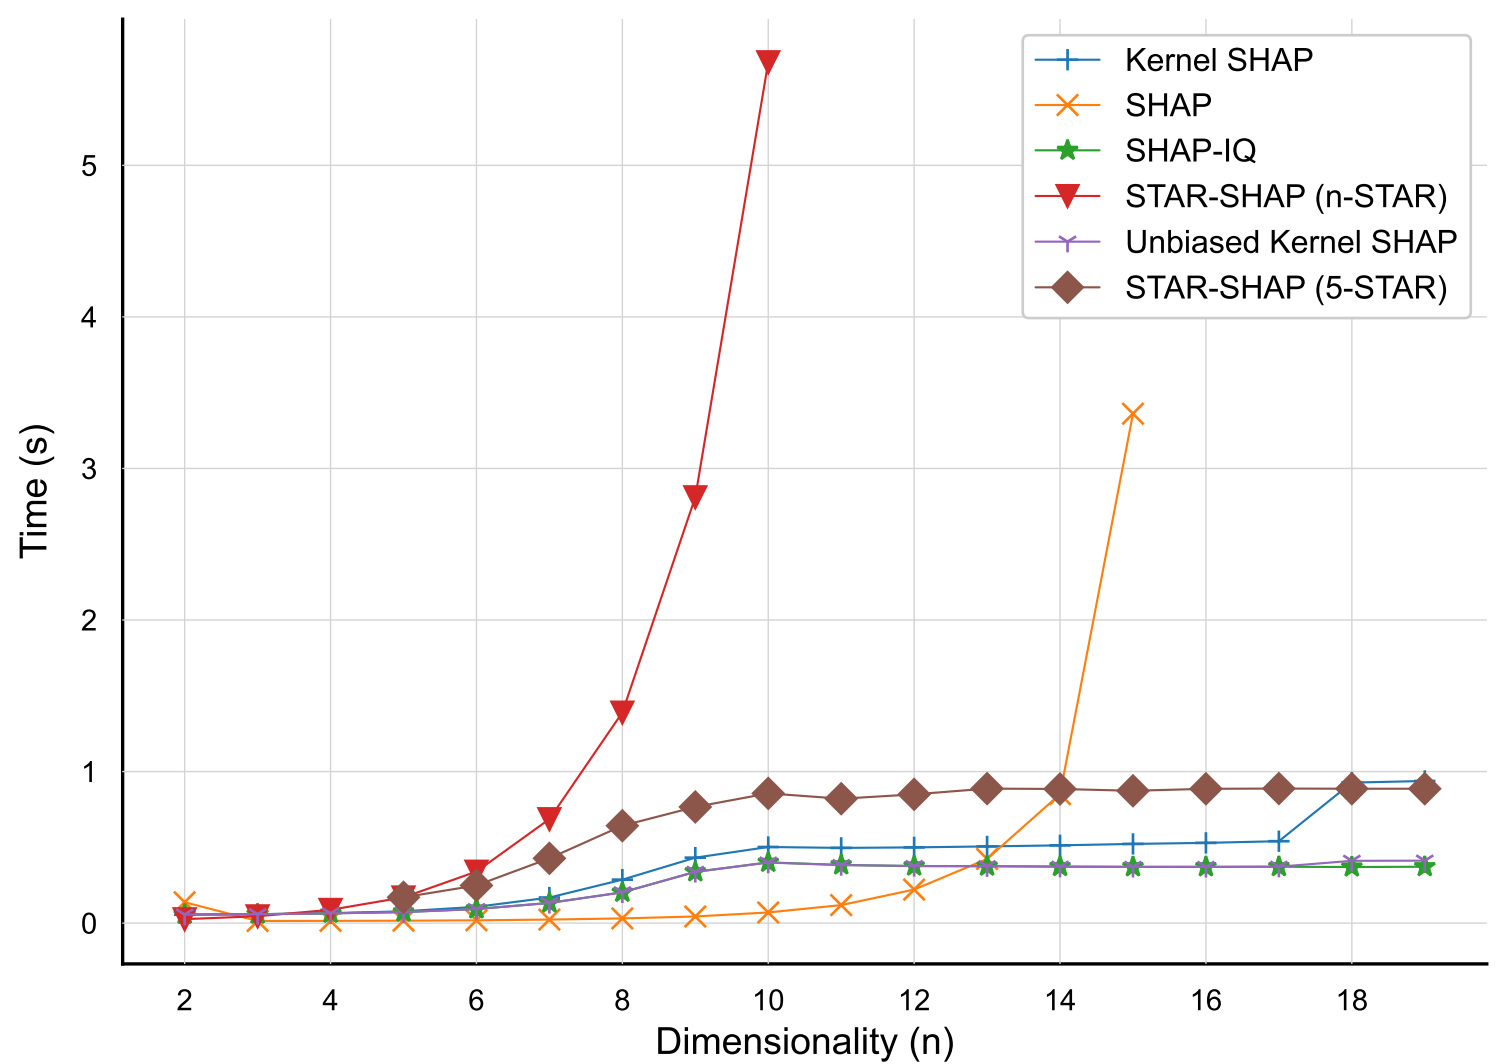

Supplement: supplementary_material [file attachment]

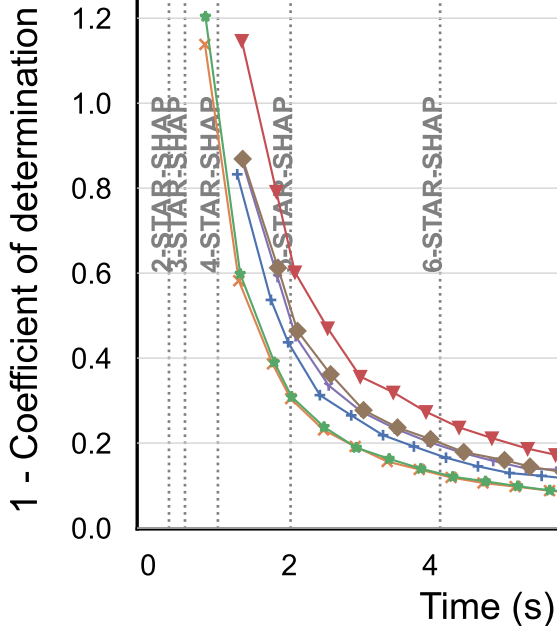

Supplement: supplementary_material [file attachment]

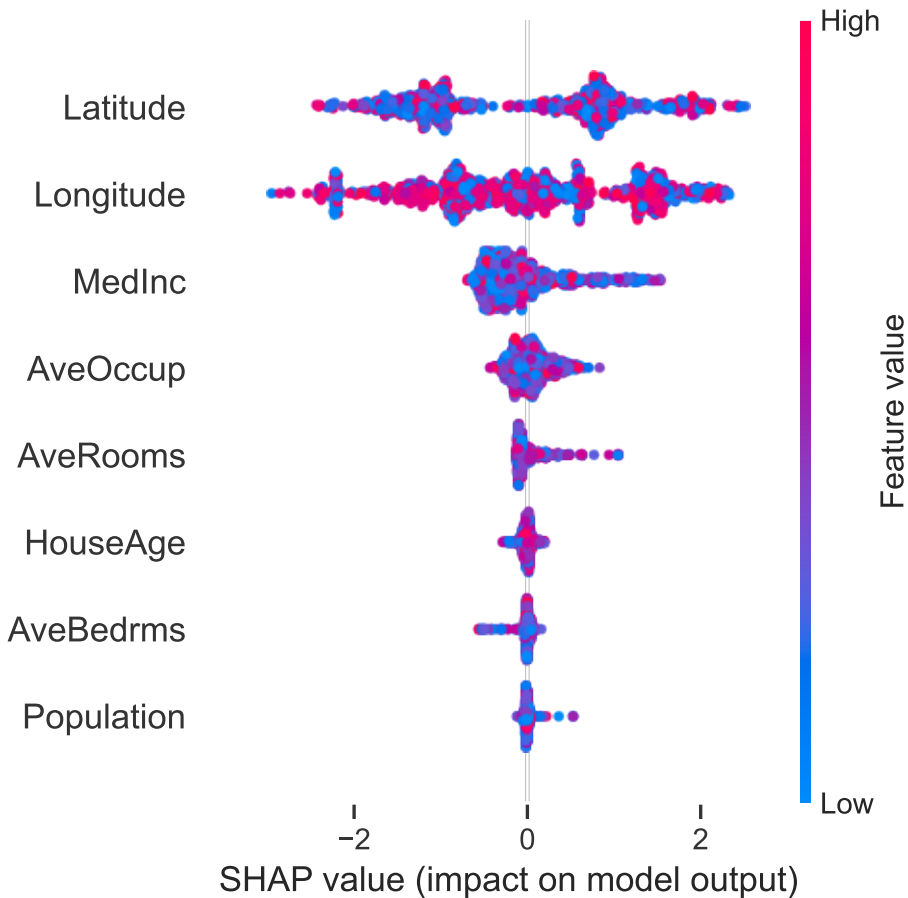

Supplement: supplementary_material [file attachment]

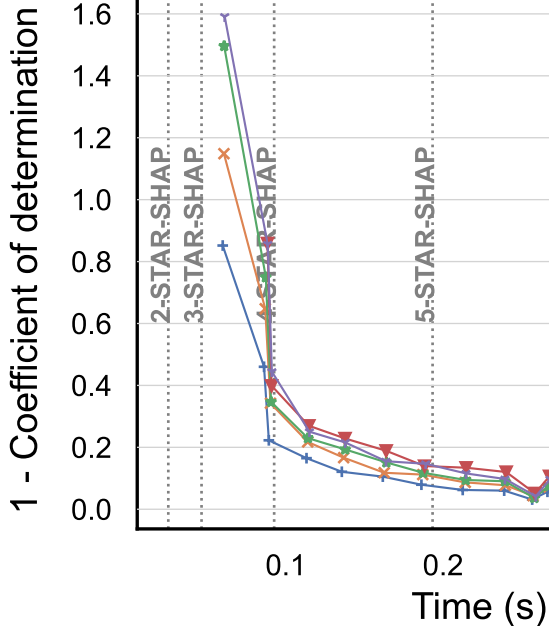

Supplement: supplementary_material [file attachment]

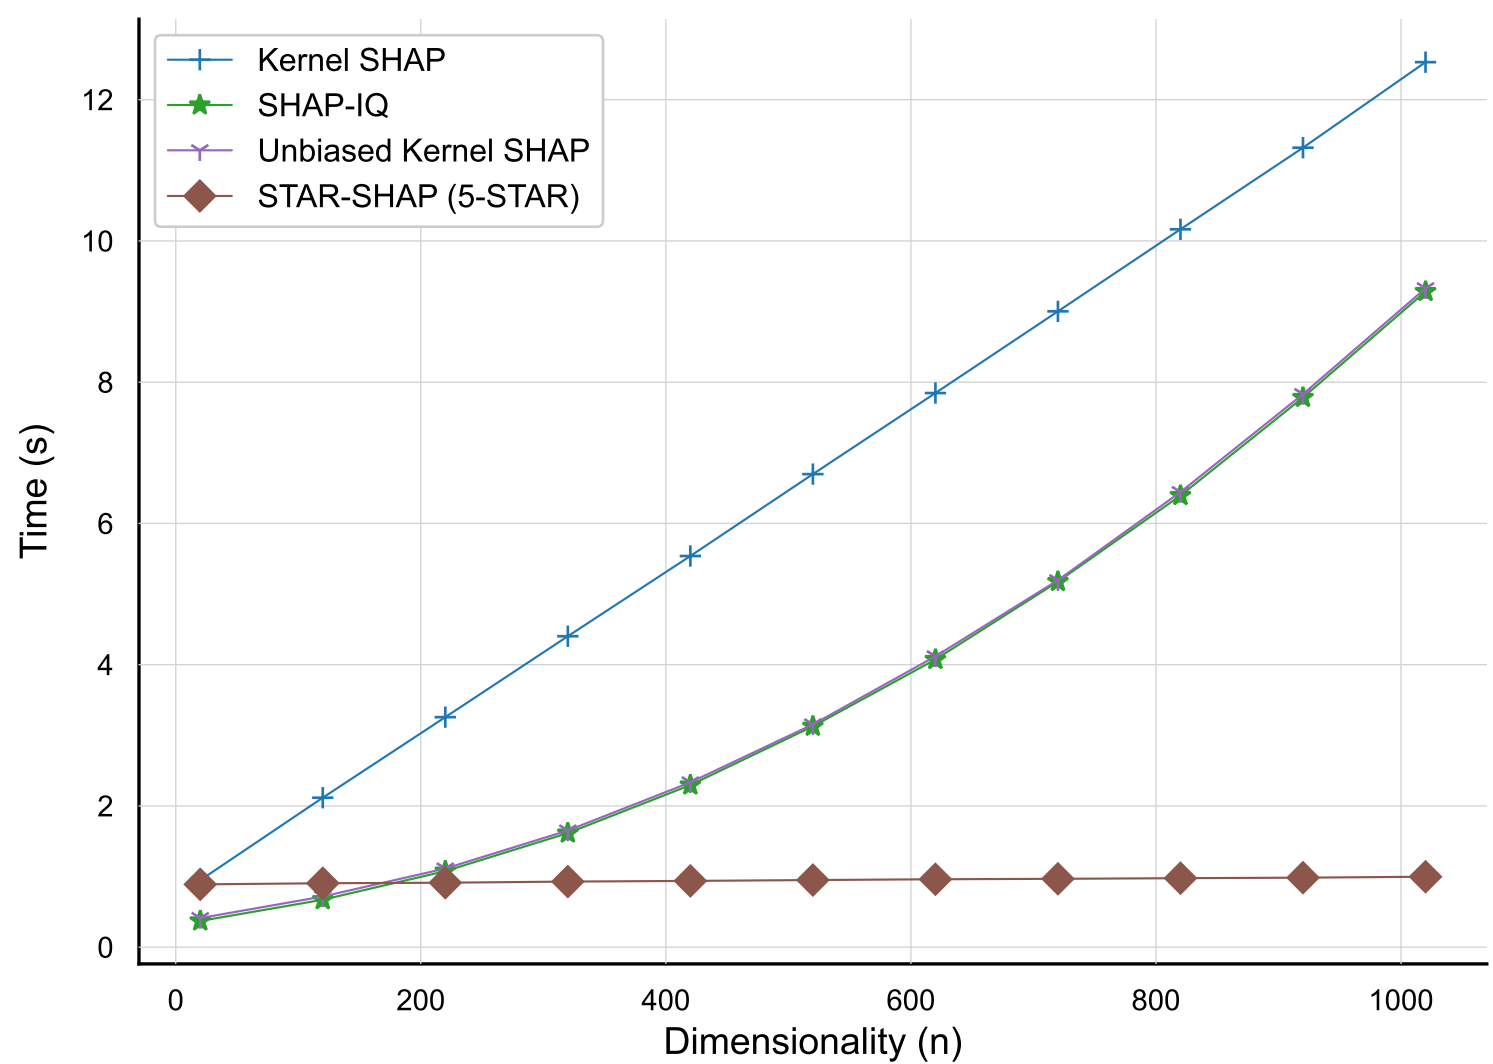

Supplement: supplementary_material [file attachment]

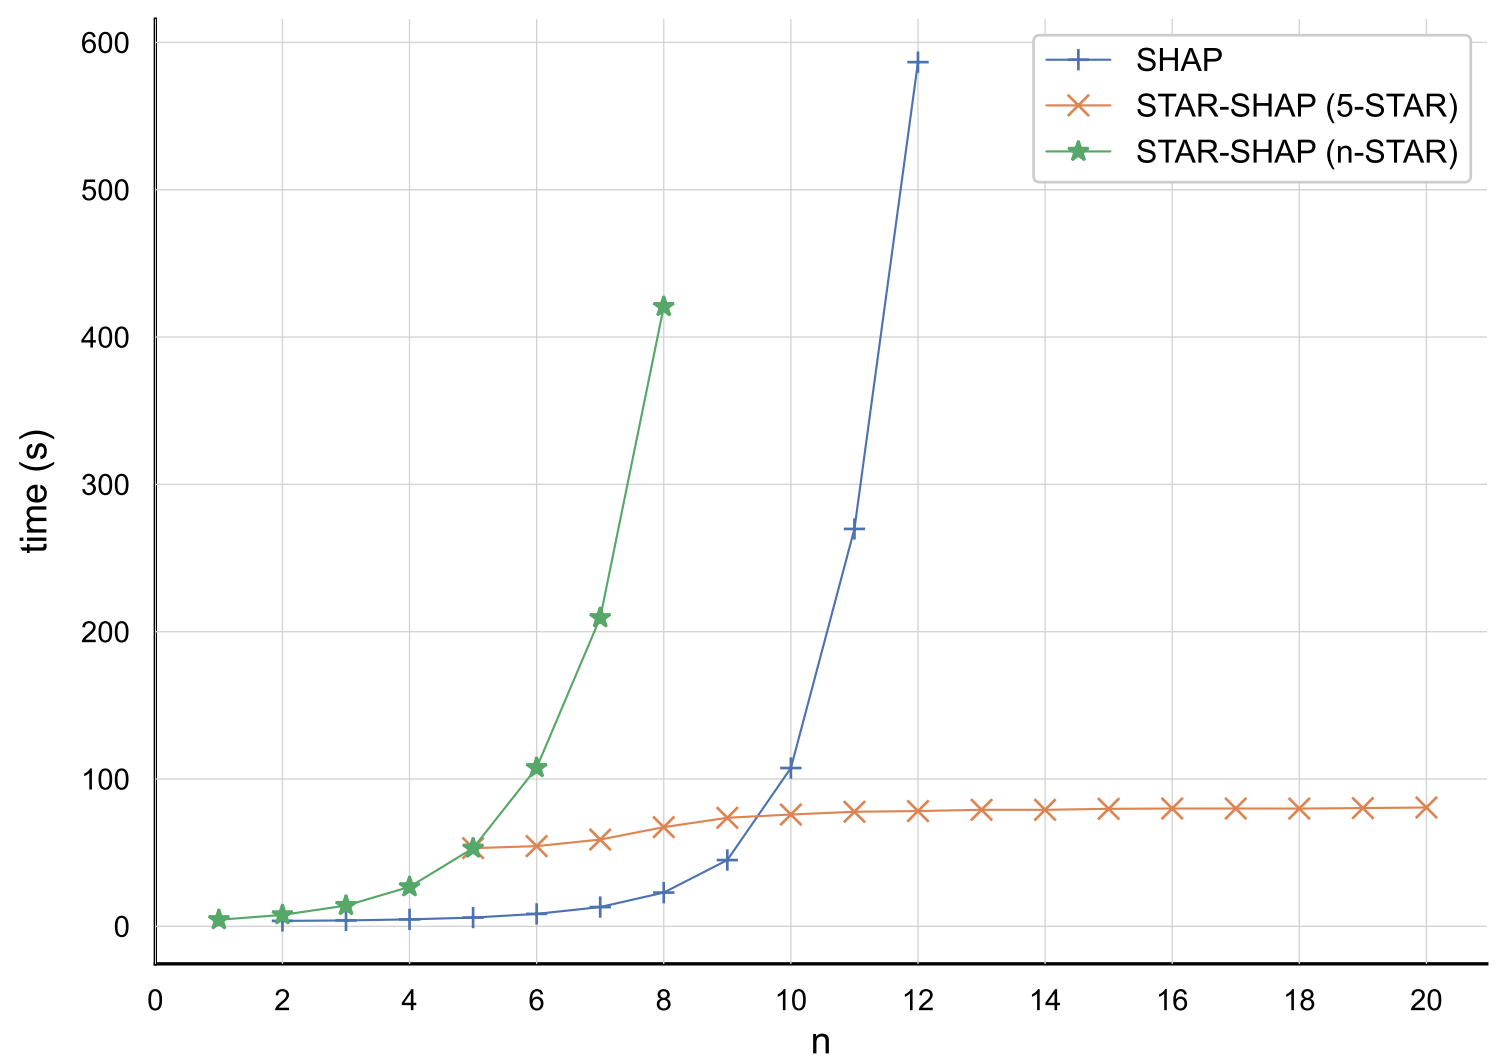

Supplement: supplementary_material [file attachment]

1 - Coefficient of determination

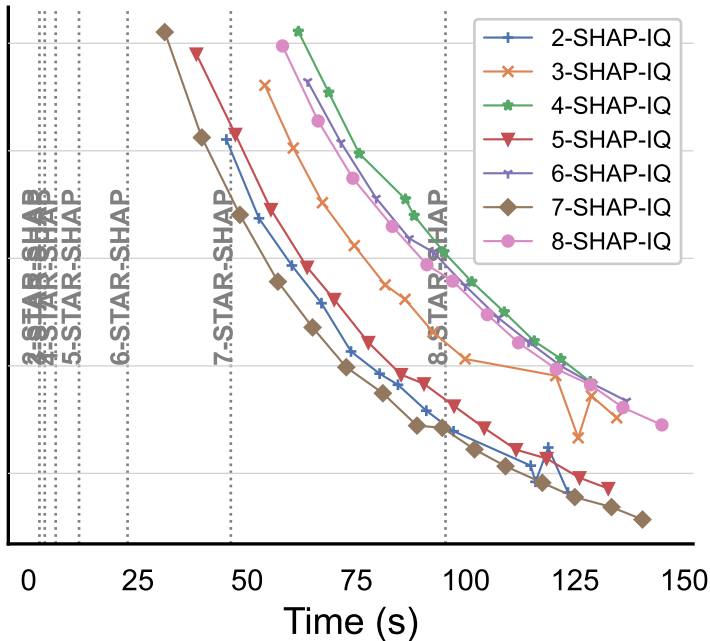

Supplement: supplementary_material [file attachment]

1 - Coefficient of determination

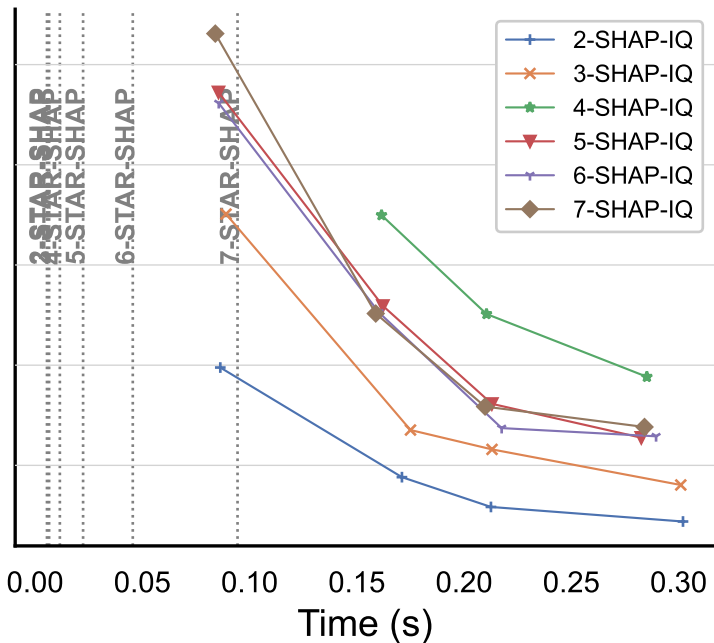

Supplement: supplementary_material [file attachment]

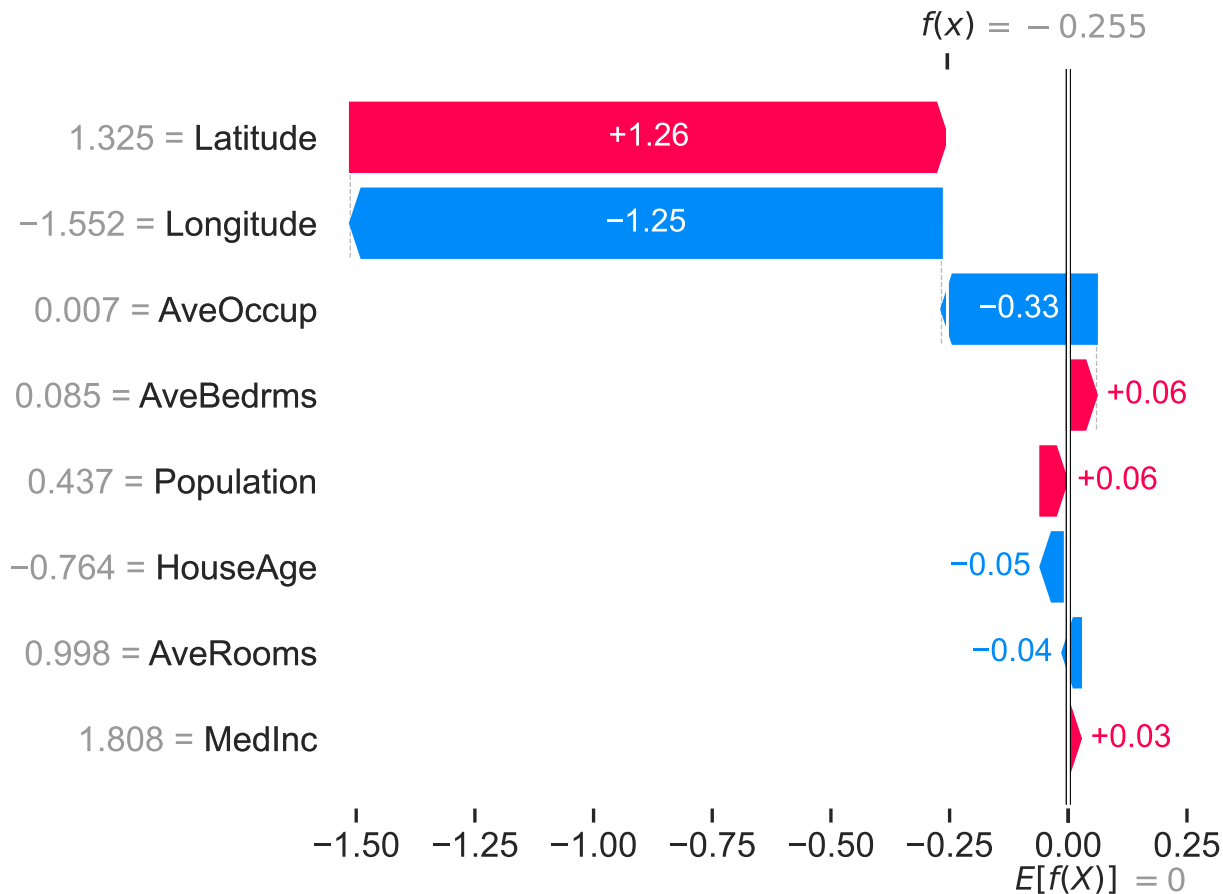

Supplement: supplementary_material [file attachment]

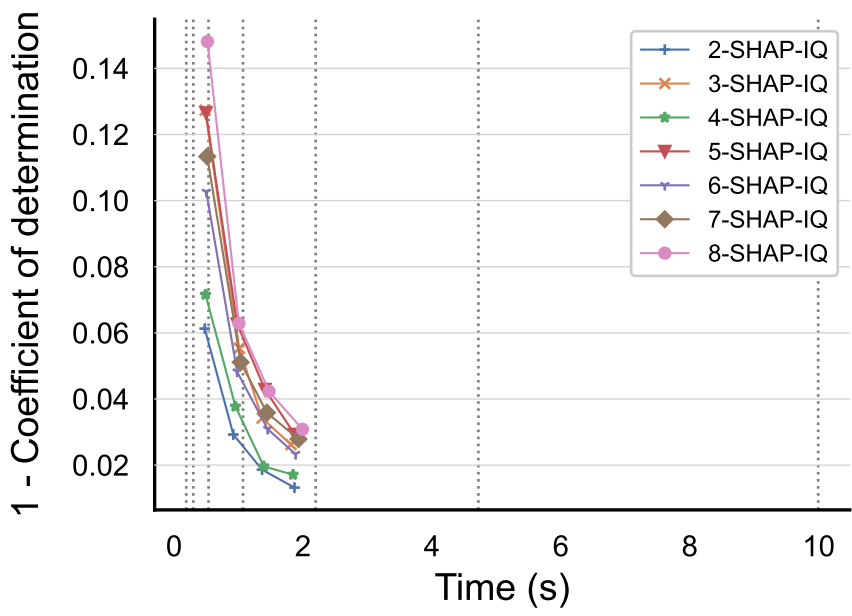

3-STAR-SHAP  
4-STAR-SHAP  
5-STAR-SHAP  
6-STAR-SHAP  
7-STAR-SHAP  
8-STAR-SHAP

Supplement: supplementary_material [file attachment]

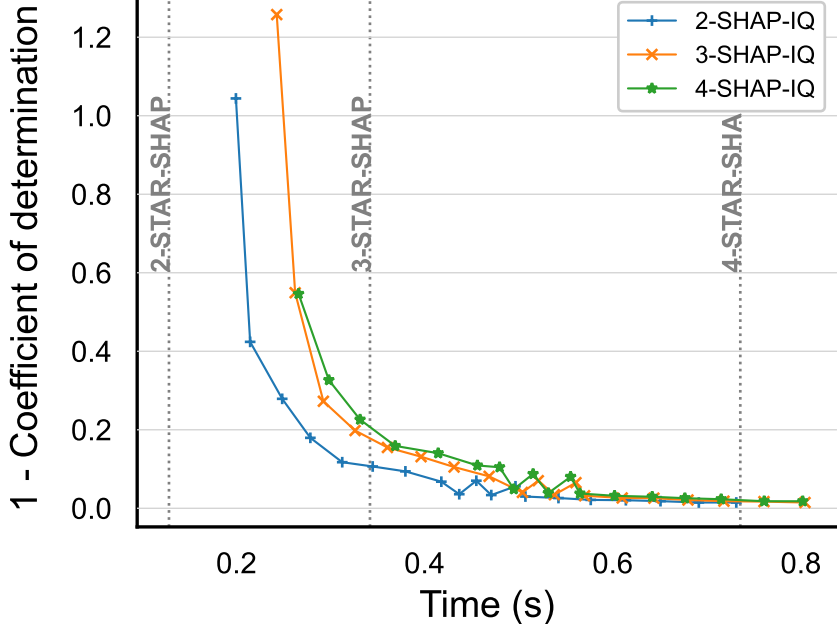

Supplement: supplementary_material [file attachment]

$$f(x) = -0.788$$

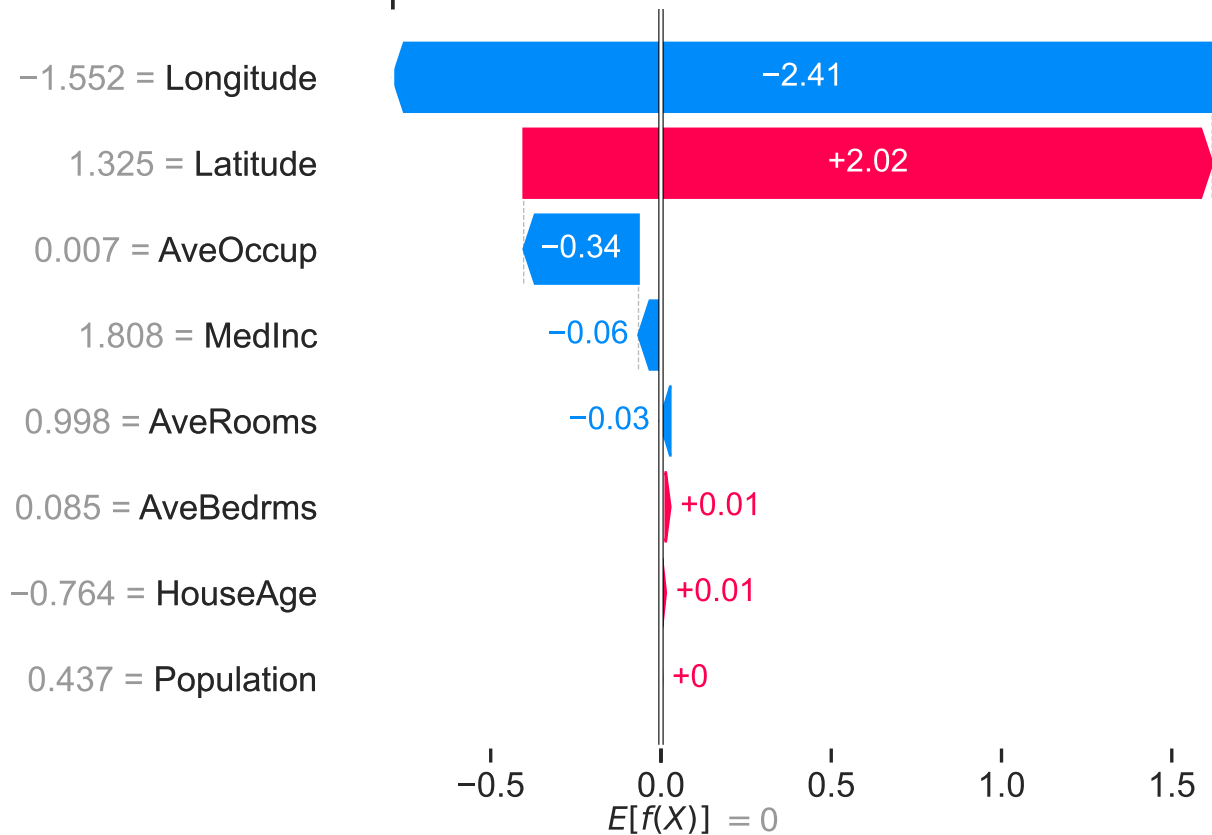

Supplement: supplementary_material [file attachment]

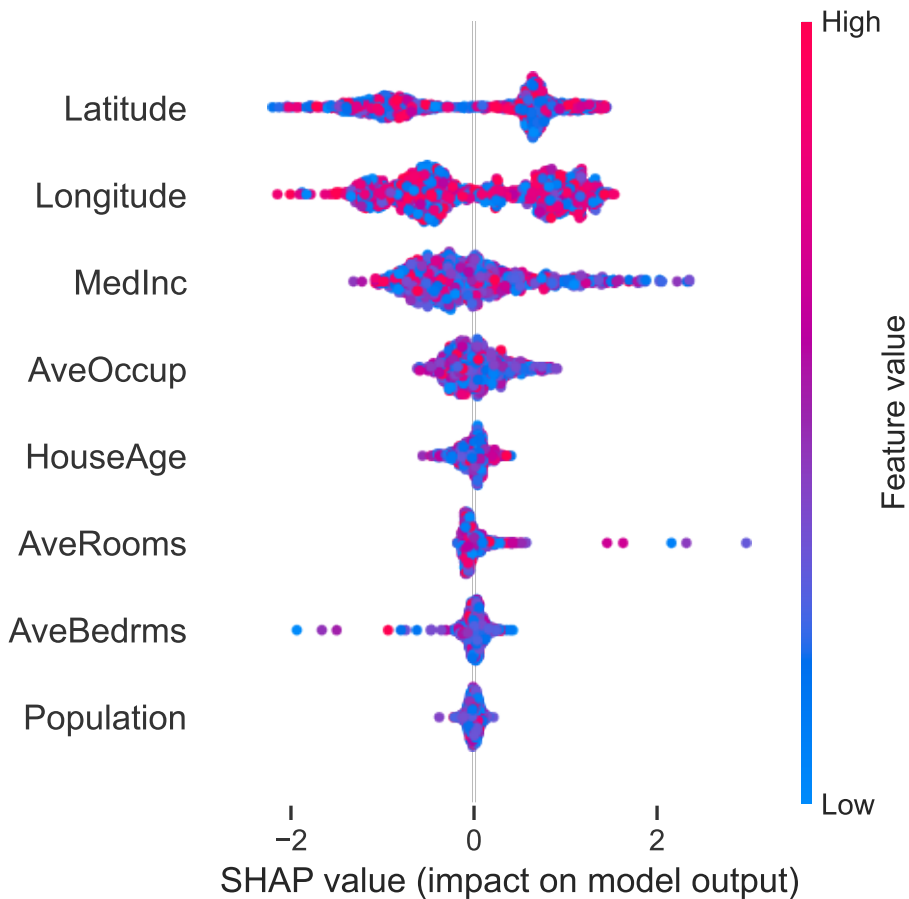

Supplement: supplementary_material [file attachment]
